# Supplementary material
Source: PubMed Central journal article supplement (PMC8967601)

**Albuminuria within normal range can predict all-cause mortality and cardiovascular mortality**

**Supplemental Figure 1 to 3**

**Corresponding author:**

Jung Pyo Lee ([jungpyolee@snu.ac.kr](mailto:jungpyolee@snu.ac.kr))

**Contents**

|                                     |   |
|-------------------------------------|---|
| <b>Supplemental Figure 1.</b> ..... | 2 |
| <b>Supplemental Figure 2.</b> ..... | 3 |
| <b>Supplemental Figure 3.</b> ..... | 4 |

**Supplemental Figure 1. Flow diagram of study cohort.**

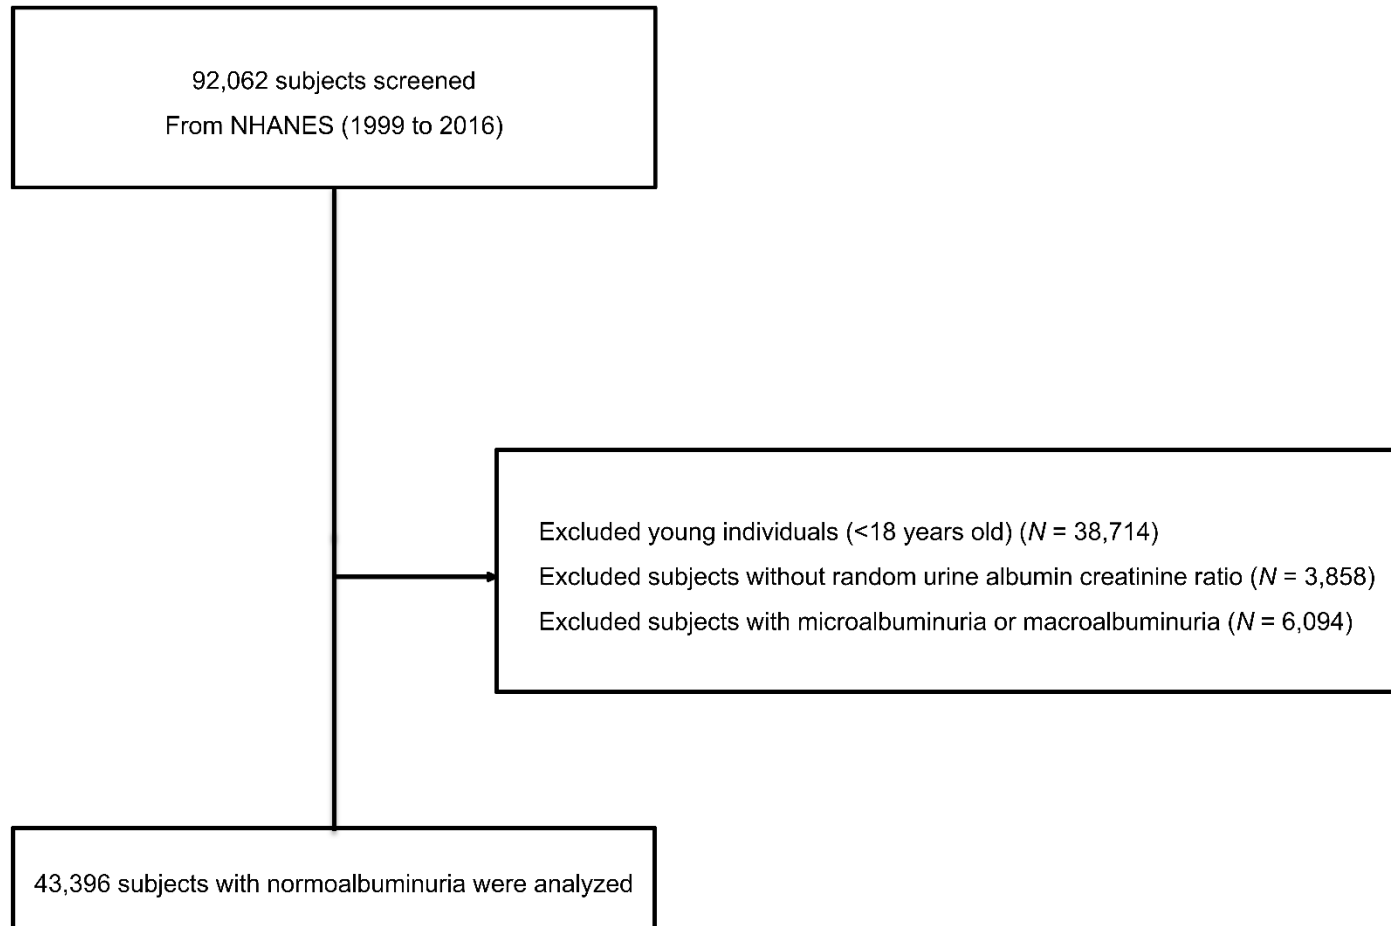

**Supplemental Figure 2. Subgroup associations of urine albumin creatine ratio with all-cause mortality.** The risks for all-cause mortality of the third quartile ( $6.211 \leq <10.010$  mg/g) for the first quartile ( $<4.171$  mg/g) were shown. Hazard ratios (HRs) were adjusted for age, sex, race, education, body mass index, smoking, diabetes mellitus, hypertension, cardiovascular event, and baseline eGFR. HR, hazard ratio; CI, confidence interval; eGFR, estimated glomerular filtration rate

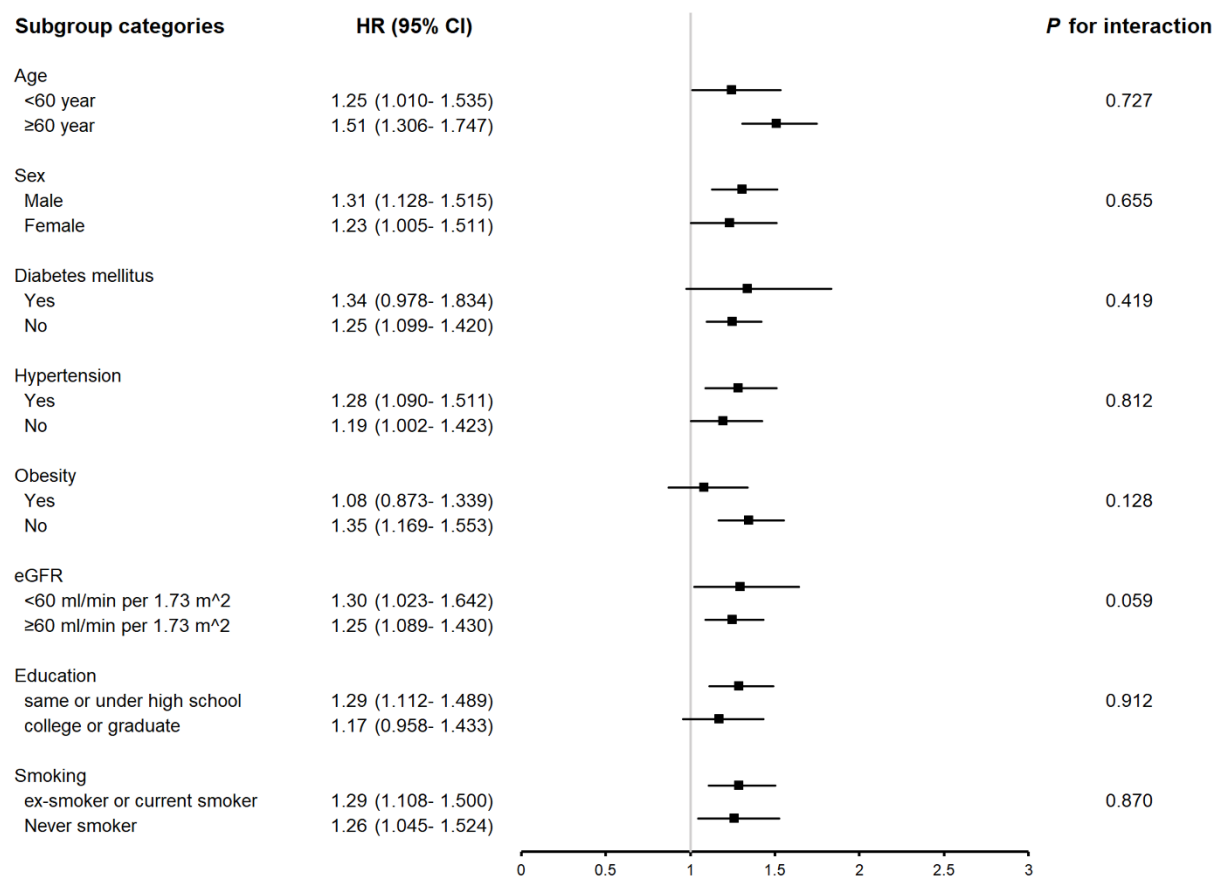

**Supplemental Figure 3. The relationship between the urine albumin-creatinine ratio and mortality.** Cubic spline curves showed that there was a linear association of the urine albumin-creatinine ratio with all-cause mortality when the reference was ACR = 4.00 mg/g (a), ACR = 5.00 mg/g (b), and ACR = 6.00 mg/g (c). All curves represent multivariable adjusted hazard ratios. Hazard ratios were adjusted for age, sex, race, education, body mass index, smoking, diabetes mellitus, hypertension, cardiovascular event, and baseline eGFR.

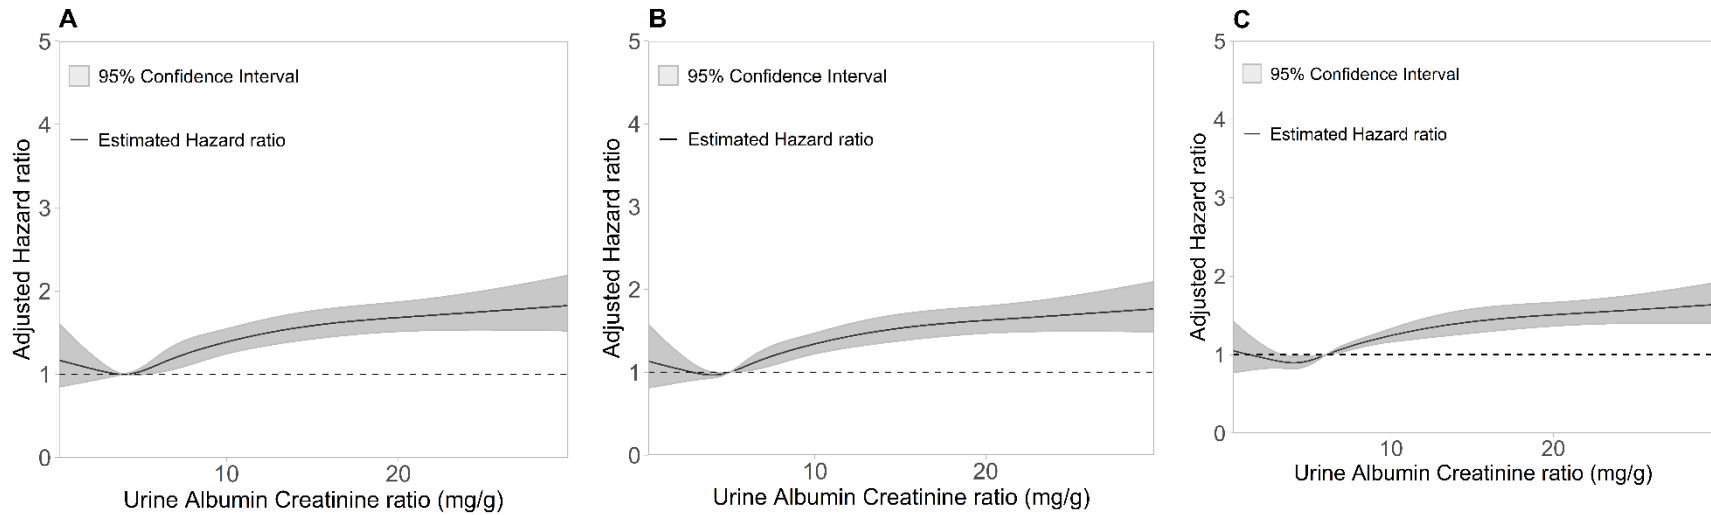

Supplement: 7592_3_supp_95725_r23x01.pdf [file 7592_3_supp_95725_r23x01.pdf]
